# Supplementary material for: The biomolecule corona of lipid nanoparticles contains circulating cell-free DNA
Source: Royal Society of Chemistry journal article supplement (doi:10.1039/d0nh00333f), 2020-01-01
Supplement: d0nh00333f1.pdf [file d0nh00333f1.pdf]

# The Biomolecule Corona of Lipid Nanoparticles Contains Circulating Cell-free DNA

Lois Gardner<sup>1,2</sup>, Jessica Warrington<sup>1</sup>, Jane Rogan<sup>3</sup>, Dominic Rothwell<sup>2</sup>, Ged Brady<sup>2</sup>,  
Caroline Dive<sup>2</sup>, Kostas Kostarelos<sup>1, 4, 5 \*</sup>, Marilena Hadjidemetriou<sup>1\*</sup>

<sup>1</sup> *Nanomedicine Lab, Faculty of Biology, Medicine and Health, AV Hill Building, The University of Manchester, Manchester, United Kingdom*

<sup>2</sup> *Cancer Research UK Manchester Institute Cancer Biomarker Centre, The University of Manchester, Manchester, United Kingdom*

<sup>3</sup> *Manchester Cancer Research Centre Biobank, The Christie NHS Foundation Trust, CRUK Manchester Institute, Manchester, United Kingdom*

<sup>4</sup> *Manchester Cancer Research Centre, The University of Manchester, 555 Wilmslow Road, Manchester M20 4GJ, United Kingdom*

<sup>5</sup> *Catalan Institute of Nanoscience and Nanotechnology (ICN2), UAB Campus, Bellaterra, Barcelona, Spain.*

---

\* Correspondence should be addressed to  
[marilena.hadjidemetriou@manchester.ac.uk](mailto:marilena.hadjidemetriou@manchester.ac.uk); [kostas.kostarelos@manchester.ac.uk](mailto:kostas.kostarelos@manchester.ac.uk)

# Supporting Information

**A**

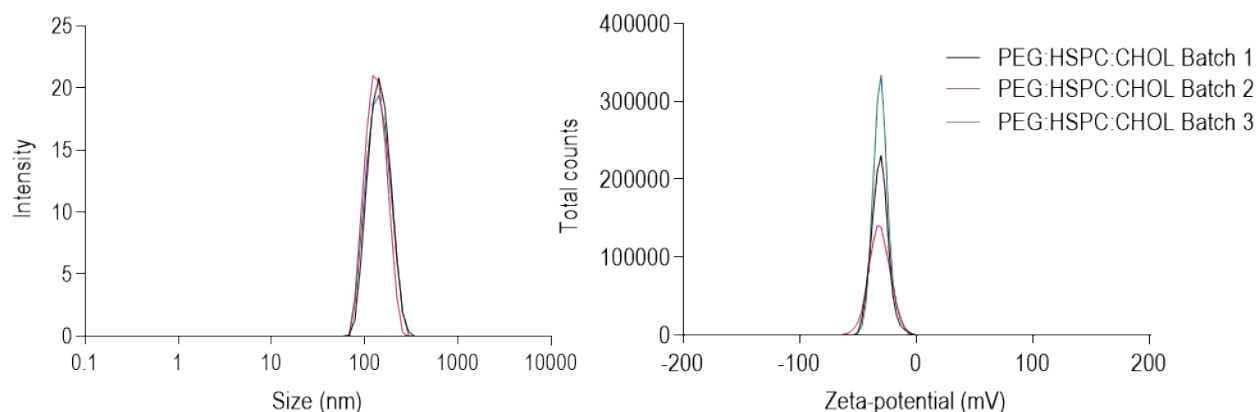

**B**

| Sample  | Size (nm)         | PDI               | $\zeta$ -potential (mV) |
|---------|-------------------|-------------------|-------------------------|
| Batch 1 | $138.3 \pm 3.061$ | $0.054 \pm 0.028$ | $-32 \pm 0.651$         |
| Batch 2 | $127.8 \pm 2.312$ | $0.043 \pm 0.003$ | $-31.4 \pm 0.929$       |
| Batch 3 | $134 \pm 1.365$   | $0.059 \pm 0.007$ | $-30.4 \pm 0.503$       |

## Supporting Figure 1

**Figure S1:** Physiochemical characterisation of liposome nanoparticles (NPs). **A)** Graphs representing the size (diameter in nm) and zeta-potential distribution (mV) of PEG:HSPC:CHOL liposome batches 1-3. **B)** Table listing the mean average size (nm), polydispersity index (PDI) and zeta-potential (mV) of each liposome batch including standard deviations.

Supporting Figure 2

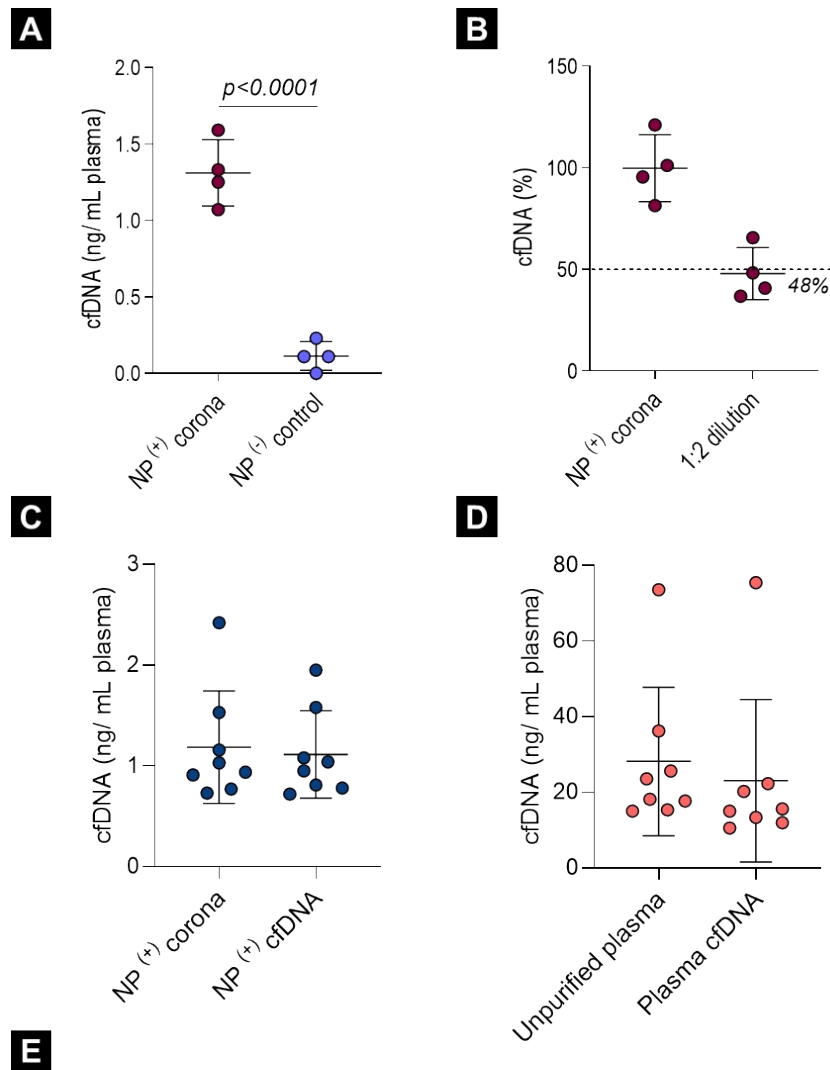

41  
42

**Figure S2:** Assessing the accuracy of direct real-time PCR cfDNA quantification in *ex vivo* healthy and disease nanoparticle corona samples. **A)** RNase P real-time qPCR quantification of in pooled healthy liposomal corona samples and liposome <sup>(-)</sup> plasma controls. **B)** Direct RNase P qPCR inhibition determined using 2-fold dilution of pooled NP corona samples. **C-D)** LINE-1 real-time qPCR quantification of cfDNA in late-stage serous ovarian cancer *ex vivo* biomolecule corona samples (n=8). Graph C represents cfDNA in NP corona samples and NP corona purified cfDNA, whereas graph D represents cfDNA in unpurified plasma (diluted 1:40) and purified plasma. All error bars represent mean and standard deviation. Groups were compared using a student t-test was performed (adjusted *p* values <0.05 were considered significant). **E)** Clinical details of eight late-stage ovarian cancer plasma samples included in graphs C and D.

# Supporting Figure 3

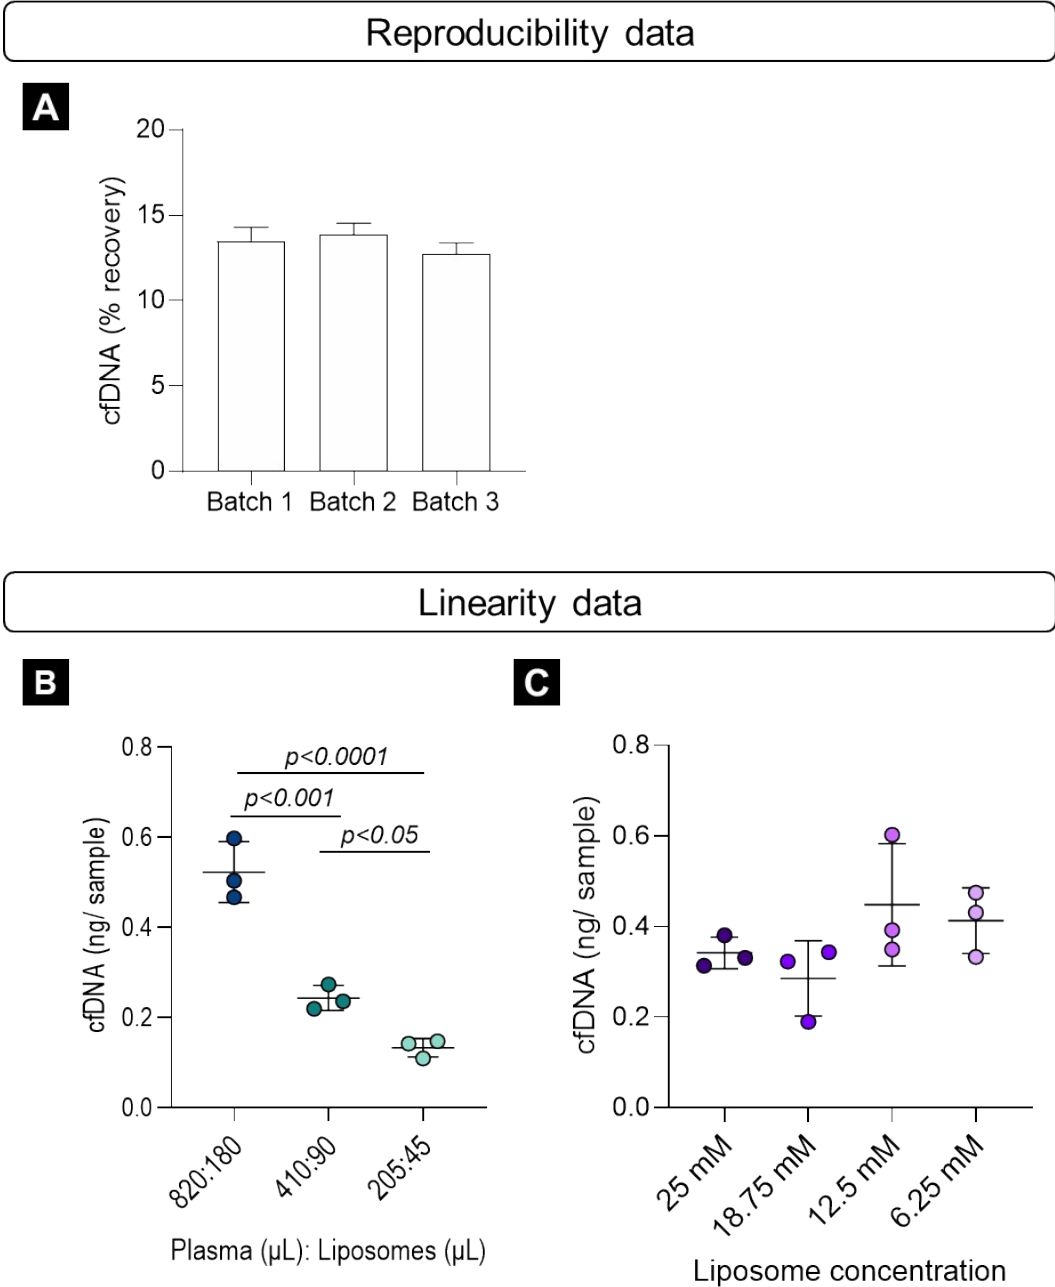

**Figure S3:** Reproducibility & linearity experiments of healthy plasma NP corona samples. **A)** Reproducibility data showing the percentage recovery (%) of QIAamp® purified NP corona cfDNA across liposome NP batches relative to QIAamp extracted plasma cfDNA (100%). **B-C)** Linearity data to investigate the effect of liposome concentration and plasma volume on cfDNA content in the liposome biomolecule corona. **B)** Graph highlighting the effect of plasma volume on cfDNA concentration (ng cfDNA/ sample). Standard protocol 820 μL plasma: 180 μL liposomes. **C)** Graph showing the effect of liposome concentration on cfDNA concentration (ng cfDNA/ sample). 12.5 mM liposomes represent standard protocol. All error bars represent mean and standard deviation. Three groups or more were compared using a one-way analyses of variance (ANOVA) test followed by the Tukey's multiple comparison test. Adjusted *p* values <0.05 were considered significant.

# Supporting Figure 4

**A**

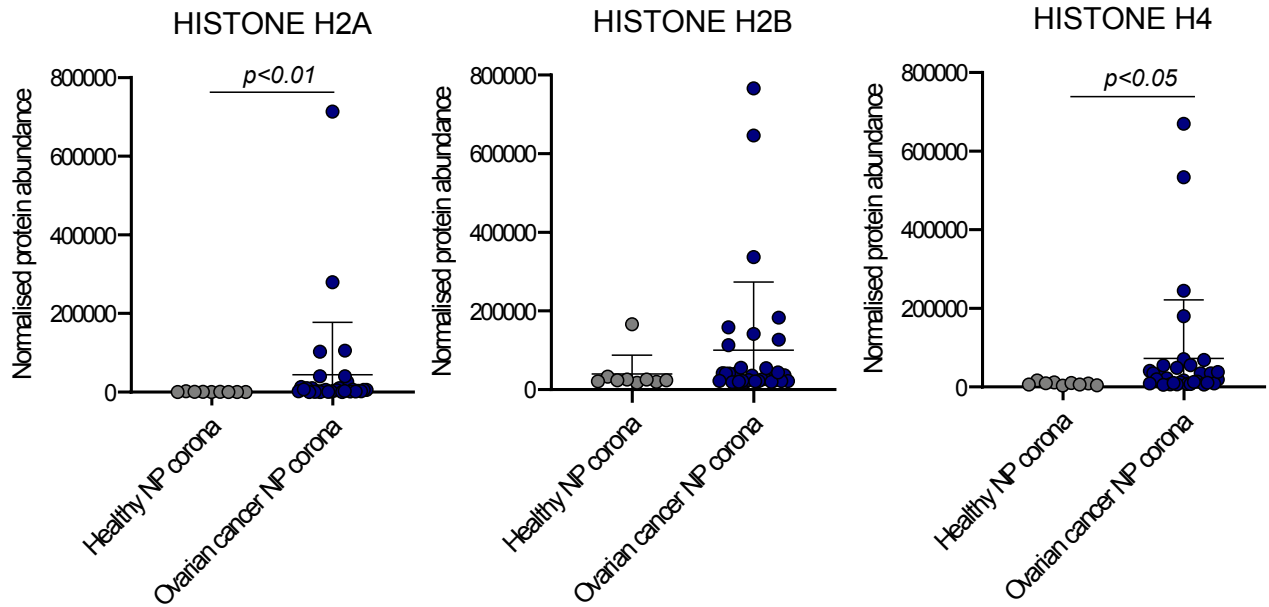

**B**

| Protein class                  | Protein name                          | Normalised abundance |                | Fold-change | q value (FDR) | UniProt ID            | Peptide count |
|--------------------------------|---------------------------------------|----------------------|----------------|-------------|---------------|-----------------------|---------------|
|                                |                                       | Healthy control      | Ovarian cancer |             |               |                       |               |
| Nucleosome-associated proteins | Histone H2A                           | 671                  | 44245          | 65.97       | 0.005         | Q96QV6 (H2A1A_HUMAN)  | 2             |
|                                | Histone H2B                           | 39619                | 100365         | 2.53        | 0.087         | Q96A08 (H2B1A_HUMAN)  | 4             |
|                                | Histone H4                            | 8788                 | 73124          | 8.32        | 0.012         | Q6B823 (Q6B823_HUMAN) | 2             |
|                                | Histone-lysine N-methyltransferase 2D | 14405221             | 20832650       | 1.45        | 0.097         | O14686 (KMT2D_HUMAN)  | 3             |
|                                | Histone PARylation factor 1           | 20019                | 3288           | 6.09        | 0.151         | Q9NWX4 (HPF1_HUMAN)   | 2             |

**Figure S4:** Histone proteins identified by LC-MS/MS in the biomolecule corona of healthy and ovarian cancer female plasma samples. **A)** LC-MS/MS normalised protein abundance of histones H2A, H2B and H4 in ovarian cancer corona samples and age-matched healthy corona controls. A one-way ANOVA was performed by the Progenesis QI software with significance bars representing FDR-adjusted  $p$  values. **B)** Table summarising the relative abundance of proteins identified by LC-MS/MS associated with nucleosomes (DNA-histone complex) known to contain cfDNA. Max fold change between ovarian cancer corona samples and healthy corona controls is provided with FDR-adjusted  $p$  value from a one-way ANOVA in Progenesis QI. Uniprot protein identifiers are provided along with LC-MS/MS peptide counts.

## Supporting Table 1

|                                    | Ovarian cancer patients |                                                                                       |                                                                  |                                                                            |                                                              |
|------------------------------------|-------------------------|---------------------------------------------------------------------------------------|------------------------------------------------------------------|----------------------------------------------------------------------------|--------------------------------------------------------------|
|                                    | Healthy                 | Stage 1                                                                               | Stage 2                                                          | Stage 3                                                                    | Stage 4                                                      |
| <b>Sample number</b>               | 11                      | 18                                                                                    | 8                                                                | 12                                                                         | 5                                                            |
| <b>Age-range (median)</b>          | 40-59 (51)              | 21-87 (59)                                                                            | 32-77 (60)                                                       | 37-74 (62)                                                                 | 36-67 (48)                                                   |
| <b>Histological subtype</b>        | N/A                     | Mucinous -11 (61%)<br>Serous- 5 (28%)<br>Clear cell-1 (5.5%)<br>Endometroid- 1 (5.5%) | Serous- 6 (75%)<br>Endometroid- 2 (25%)                          | Serous- 9 (75%)<br>Adenocarcinoma (NOS)- 2 (17%)<br>Carcinosarcoma- 1 (8%) | Serous- 5 (100%)                                             |
| <b>Germline BRCA status</b>        | N/A                     | Positive- 0 (0%)<br>Negative- 1 (5.5%)<br>Unknown- 17 (94.5%)                         | Positive- 0 (0%)<br>Negative- 3 (37.5%)<br>Unknown- 5 (62.5%)    | Positive- 1 (8%)<br>Negative- 0 (0%)<br>Unknown- 11 (92%)                  | Positive- 1 (20%)<br>Negative- 3 (60%)<br>Unknown- 1 (20%)   |
| <b>Baseline CA125 (U/ mL)</b>      | N/A                     | Median 60 (12-550)                                                                    | Median 29.5 (4-600)                                              | Median 16 (7-358)                                                          | Median 15 (9-396)                                            |
| <b>Prior lines of chemotherapy</b> | N/A                     | 0 (94%)<br>2 (6%)                                                                     | 0 (62.5%)<br>1 (37.5%)                                           | 0 (50%)<br>1 (42%)<br>2 (8%)                                               | 0 (20%)<br>1 (80%)                                           |
| <b>Platinum sensitivity</b>        | N/A                     | Sensitive- 6 (33%)<br>Resistant- 1 (6%)<br>Unknown- 11 (61%)                          | Sensitive- 3 (37.5%)<br>Resistant- 1 (12.5%)<br>Unknown- 4 (50%) | Sensitive- 1 (8%)<br>Resistant- 0 (0%)<br>Unknown- 11 (92%)                | Sensitive- 2 (40%)<br>Resistant- 1 (20%)<br>Unknown- 2 (40%) |

**Table S1:** Table outlining clinical characteristics of ovarian cancer patient cohort and healthy normal volunteers (HNVs). Details include sample number (n), age-range (years), histological subtype, germline BRCA mutation status, baseline CA125 concentration (U/ mL), prior lines of chemotherapy and platinum sensitivity.
